## Regulation of sarcoendoplasmic reticulum $\text{Ca}^{2+}$ -ATPase (SERCA) in turtle muscle and liver during acute exposure to anoxia

C. J. Ramnanan, D. C. McMullen, A. Bielecki and K. B. Storey

10.1242/jeb.042416

There was an error published in *J. Exp. Biol.* **213** 17-25.

In Fig. 1C, the bars depicting  $V_{\max}$  values for kidney and brain should not have had significance indicators on them. These were accidentally introduced during the production process. As stated in the Results and Discussion of the paper, the only tissues in which  $V_{\max}$  values differed between normoxia and anoxia were muscle, liver and heart.

The correct version of the figure is shown below.

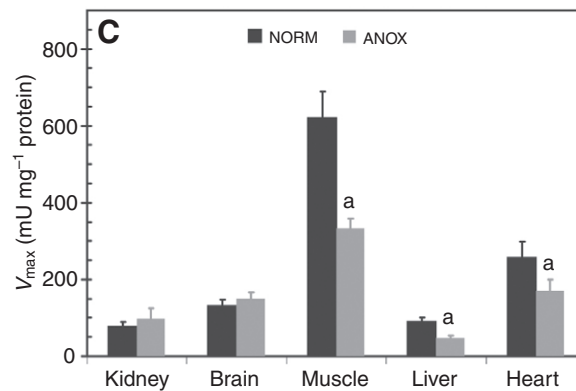

This error does not affect the results or conclusions of the paper.

We apologise to authors and readers for this error.
